# Supplementary material for: Prevalence and Sociodemographic Correlates of Adolescent Use and Polyuse of Combustible, Vaporized, and Edible Cannabis Products
Source: PubMed Central journal article supplement (PMC6324616; doi:10.1001/jamanetworkopen.2018.2765), 2018-09-28

## Supplementary Online Content

Peters EN, Bae D, Barrington-Trimis JL, Jarvis BP, Leventhal AM. Prevalence and sociodemographic correlates of adolescent use and polyuse of combustible, vaporized, and edible cannabis products. *JAMA Netw Open*. 2018;1(5):e182765. doi:10.1001/jamanetworkopen.2018.2765

**eTable 1.** Differences Between Study Enrollees Included (n = 3177) vs Excluded (n = 219) in the Analytic Sample on Participant Characteristics at Study Enrollment (Fall 9th Grade)

**eTable 2.** Prevalence of Cannabis Use by Administration Method and Demographic Characteristics

**eTable 3.** Differences in Cannabis Use and Sociodemographic Correlates of Cannabis Use by Administration Method Using Multiple Imputation to Address Missing Sociodemographic Data (n = 3177)

**eTable 4.** Association of Race/Ethnicity With Cannabis Use, Stratified by Administration Method

**eFigure.** Recruitment Flowchart

This supplementary material has been provided by the authors to give readers additional information about their work.

**eTable 1. Differences Between Study Enrollees Included (n = 3177) vs Excluded (n = 219) in the Analytic Sample on Participant Characteristics at Study Enrollment (Fall 9th Grade)**

|                                     | Included (N = 3177)<br>No. (%) or Mean (SD) | Excluded (N = 219)<br>No. (%) or Mean (SD) | P Value |
|-------------------------------------|---------------------------------------------|--------------------------------------------|---------|
| <b>Sex</b>                          |                                             |                                            |         |
| Available sample, No.               | 3177                                        | 217                                        |         |
| Male, No. (%)                       | 1462 (46.0)                                 | 119 (54.8)                                 | .01     |
| Female, No. (%)                     | 1715 (54.0)                                 | 98 (45.2)                                  |         |
| <b>Age, Mean (SD)</b>               | 14.57 (.40)                                 | 14.63 (.43)                                | .05     |
| Available sample, No.               | 3175                                        | 204                                        |         |
| <b>Race/ethnicity</b>               |                                             |                                            |         |
| Available sample, No.               | 3126                                        | 200                                        |         |
| Asian, No. (%)                      | 537 (17.2)                                  | 23 (11.5)                                  | .03     |
| African American, No. (%)           | 149 (4.8)                                   | 17 (8.5)                                   |         |
| Hispanic, No. (%)                   | 1510 (48.3)                                 | 95 (47.5)                                  |         |
| White, No. (%)                      | 507 (16.2)                                  | 37 (18.5)                                  |         |
| Multiethnic or multiracial, No. (%) | 207 (6.6)                                   | 18 (9.0)                                   |         |
| Other, <sup>a</sup> No. (%)         | 216 (6.8)                                   | 10 (5.0)                                   |         |
| <b>Combustible cannabis use</b>     |                                             |                                            |         |
| Ever use, No. (%)                   | 463 (14.7)                                  | 68 (33.8)                                  | <.001   |
| Available sample, No.               | 3147                                        | 201                                        |         |
| Past 30-day use, No. (%)            | 235 (7.4)                                   | 36 (17.8)                                  | <.001   |
| Available sample, No.               | 3164                                        | 202                                        |         |

Note. <sup>a</sup>Other category combines American Indian/Alaska Native, Native Hawaiian/Pacific Islander, and respondents who did not self-identify with any of the categories provided.

**eTable 2. Prevalence of Cannabis Use by Administration Method and Demographic Characteristics<sup>a</sup>**

|                 | Sex                            |                                  | Race/Ethnicity                |                               |                                   |                               |                                     |                                            | SES                           |                              |
|-----------------|--------------------------------|----------------------------------|-------------------------------|-------------------------------|-----------------------------------|-------------------------------|-------------------------------------|--------------------------------------------|-------------------------------|------------------------------|
|                 | Males<br>(n=1462) <sup>c</sup> | Females<br>(n=1715) <sup>c</sup> | Asian<br>(n=537) <sup>c</sup> | Black<br>(n=149) <sup>c</sup> | Hispanic<br>(n=1510) <sup>c</sup> | White<br>(n=507) <sup>c</sup> | Multiethnic<br>(n=207) <sup>c</sup> | Other <sup>b</sup><br>(n=216) <sup>c</sup> | High<br>(n=1099) <sup>c</sup> | Low<br>(n=1654) <sup>c</sup> |
| Ever use        |                                |                                  |                               |                               |                                   |                               |                                     |                                            |                               |                              |
| Combustible     | 459<br>(31.4)                  | 534<br>(31.1)                    | 77 (14.3)                     | 52 (34.9)                     | 575<br>(38.1)                     | 140<br>(27.6)                 | 63 (30.4)                           | 62 (28.7)                                  | 242 (22.0)                    | 614 (37.1)                   |
| Edible          | 303<br>(20.7)                  | 373<br>(21.7)                    | 49 (9.1)                      | 29 (19.5)                     | 409<br>(27.1)                     | 92 (18.1)                     | 43 (20.8)                           | 40 (18.5)                                  | 166 (15.1)                    | 408 (24.7)                   |
| Vaped           | 170<br>(11.6)                  | 163 (9.5)                        | 16 (3.0)                      | 15 (10.1)                     | 189<br>(12.5)                     | 50 (9.9)                      | 29 (14.0)                           | 27 (12.5)                                  | 93 (8.5)                      | 186 (11.2)                   |
| Past 30 day use |                                |                                  |                               |                               |                                   |                               |                                     |                                            |                               |                              |
| Combustible     | 202<br>(13.8)                  | 224<br>(13.1)                    | 27 (5.0)                      | 21 (14.1)                     | 238<br>(15.8)                     | 77 (15.2)                     | 33 (15.9)                           | 21 (9.7)                                   | 116 (10.6)                    | 248 (15.0)                   |
| Edible          | 123 (8.4)                      | 126 (7.3)                        | 13 (2.4)                      | 12 (8.1)                      | 148 (9.8)                         | 38 (7.5)                      | 17 (8.2)                            | 15(6.9)                                    | 63 (5.7)                      | 144 (8.7)                    |
| Vaped           | 89 (6.1)                       | 67 (3.9)                         | 6 (1.1)                       | 6 (4.0)                       | 83 (5.5)                          | 33 (6.5)                      | 11 (5.3)                            | 13(6.0)                                    | 49 (4.5)                      | 78 (4.7)                     |

<sup>a</sup>Data are expressed as No.(%). <sup>b</sup>Other category combines American Indian/Alaska Native (n = 32, 1.0%), Native Hawaiian/Pacific Islander (n = 136, 4.4%), and respondents who did not self-identify with any of the categories provided (n = 48, 1.5%). <sup>c</sup>The denominator is for each column.

**eTable 3. Differences in Cannabis Use and Sociodemographic Correlates of Cannabis Use by Administration Method Using Multiple Imputation to Address Missing Sociodemographic Data (n = 3177)**

| Regressor                                                          | Outcome <sup>a</sup>  |                    |                              |                    |                                        |                  |
|--------------------------------------------------------------------|-----------------------|--------------------|------------------------------|--------------------|----------------------------------------|------------------|
|                                                                    | Ever use <sup>b</sup> |                    | Past 30-day use <sup>b</sup> |                    | Days used in past 30 days <sup>c</sup> |                  |
|                                                                    | OR (95% CI)           | P Value            | OR (95% CI)                  | P Value            | B (95% CI)                             | P Value          |
| <b>Main Effect of Administration Method<sup>a</sup></b>            |                       |                    |                              |                    |                                        |                  |
| Combustible vs. Vaped                                              | 4.11 (3.62 to 4.66)   | <.001              | 3.10 (2.77 to 3.46)          | <.001              | 1.71 (1.01 to 2.41)                    | <.001            |
| Edible vs. Vaped                                                   | 2.37 (2.05 to 2.73)   | <.001              | 1.66 (1.33 to 2.08)          | <.001              | -1.00 (-1.76 to -0.24)                 | .01              |
| Combustible vs. Edible                                             | 1.74 (1.58 to 1.91)   | <.001              | 1.86 (1.74 to 1.99)          | <.001              | 2.71 (2.12 to 3.30)                    | <.001            |
| <b>Sociodemographic Correlates of Use by Administration Method</b> |                       |                    |                              |                    |                                        |                  |
| Sex x Administration Method Interaction Estimate <sup>a,d</sup>    |                       |                    |                              |                    |                                        |                  |
| Sex estimates stratified by administration method <sup>e</sup>     | 1.00 (0.78 to 1.27)   | .98                | 0.93 (0.63 to 1.38)          | .72                | -3.49 (-4.26 to -2.71)                 | <.001            |
| Female vs. Male (Outcome: Combustible)                             | 1.08 (0.83 to 1.40)   | .57                | 0.87 (0.60 to 1.26)          | .45                | -2.09 (-2.97 to -1.21)                 | <.001            |
| Female vs. Male (Outcome: Edible)                                  | 0.79 (0.72 to 0.87)   | <.001              | 0.62 (0.41 to 0.94)          | .02                | -2.64 (-3.83 to -1.44)                 | <.001            |
| Female vs. Male (Outcome: Vaped)                                   | N/A                   | <.001 <sup>e</sup> | N/A                          | <.001 <sup>e</sup> | N/A                                    | .06 <sup>e</sup> |
| SES x Administration Method Interaction Estimate <sup>a,d</sup>    |                       |                    |                              |                    |                                        |                  |
| SES estimates stratified by administration method <sup>e</sup>     | 1.57 (1.46 to 1.69)   | <.001              | 1.29 (1.14 to 1.38)          | <.001              | -1.40 (-2.27 to -0.53)                 | .002             |
| Low vs. High SES (Outcome: Combustible)                            | 1.34 (1.24 to 1.45)   | <.001              | 1.13 (0.99 to 1.28)          | .06                | 1.05 (0.03 to 2.07)                    | .04              |
| Low vs. High SES (Outcome: Edible)                                 | 1.02 (0.91 to 1.13)   | .78                | 0.85 (0.70 to 1.04)          | .11                | -0.01 (-1.34 to 1.30)                  | .98              |
| Low vs. High SES (Outcome: Vaped)                                  | N/A                   | .45 <sup>e</sup>   | N/A                          | .60 <sup>e</sup>   | N/A                                    | .75 <sup>e</sup> |

*Note.* <sup>a</sup>Estimates from generalized linear mixed models (GLMM) of association of sociodemographics, administration method, and their interaction as simultaneous regressors, adjusted for school random effects and respondents' age. Main effects sociodemographic variables not presented. <sup>b</sup>Binary logistic regression models in overall sample (N = 3177). <sup>c</sup>Linear regression amongst past 30-day users (N = 474). <sup>d</sup>Interaction terms were added to models one at a time; main effect estimates exclude interaction terms. <sup>e</sup>Estimates from univariable generalized linear mixed models with school random effects.

**eTable 4. Association of Race/Ethnicity With Cannabis Use, Stratified by Administration Method**

| Regressor                   | Outcome <sup>a</sup>  |         |                              |         |                                        |         |
|-----------------------------|-----------------------|---------|------------------------------|---------|----------------------------------------|---------|
|                             | Ever use <sup>b</sup> |         | Past 30-day use <sup>b</sup> |         | Days used in past 30 days <sup>c</sup> |         |
|                             | OR (95% CI)           | P Value | OR (95% CI)                  | P Value | b (95% CI)                             | P Value |
| <b>Outcome: Combustible</b> |                       |         |                              |         |                                        |         |
| Asian (Reference)           |                       |         |                              |         |                                        |         |
| Black                       | 2.35 (1.53 to 3.60)   | <.001   | 2.33 (1.26 to 4.29)          | .01     | 4.37 (-1.28 to 10.02)                  | .13     |
| Hispanic                    | 2.51 (1.87 to 3.36)   | <.001   | 2.33 (1.51 to 3.62)          | <.001   | 3.13 (-0.81 to 7.07)                   | .12     |
| White                       | 1.81 (1.28 to 2.55)   | .001    | 2.27 (1.39 to 3.70)          | .001    | 5.15 (0.81 to 9.49)                    | .02     |
| Multiethnic                 | 2.05 (1.38 to 3.04)   | <.001   | 2.63 (1.52 to 4.54)          | .001    | 3.31 (-1.73 to 8.35)                   | .20     |
| Other                       | 1.91 (1.29 to 2.83)   | .001    | 1.54 (0.84 to 2.80)          | .16     | 5.09 (-0.56 to 10.73)                  | .08     |
| <b>Outcome: Vaporized</b>   |                       |         |                              |         |                                        |         |
| Asian (Reference)           |                       |         |                              |         |                                        |         |
| Black                       | 1.93 (1.15 to 3.23)   | .01     | 2.82 (1.25 to 6.37)          | .01     | 3.81 (-3.14 to 10.76)                  | .28     |
| Hispanic                    | 2.73 (1.94 to 3.86)   | <.001   | 3.15 (1.72 to 5.75)          | <.001   | 2.02 (-3.12 to 7.16)                   | .44     |
| White                       | 1.99 (1.33 to 2.97)   | .001    | 2.89 (1.47 to 5.65)          | .002    | 0.25 (-5.47 to 5.97)                   | .93     |
| Multiethnic                 | 2.20 (1.39 to 3.48)   | .001    | 2.98 (1.41 to 6.31)          | .004    | 2.40 (-4.00 to 8.80)                   | .46     |
| Other                       | 1.89 (1.19 to 3.01)   | .01     | 2.48 (1.16 to 5.33)          | .02     | 1.33 (-5.31 to 7.97)                   | .69     |
| <b>Outcome: Edible</b>      |                       |         |                              |         |                                        |         |
| Asian (Reference)           |                       |         |                              |         |                                        |         |
| Black                       | 2.66 (1.27 to 5.57)   | .01     | 3.42 (1.08 to 10.77)         | .04     | 2.50 (-8.17 to 13.17)                  | .64     |
| Hispanic                    | 3.14 (1.82 to 5.42)   | <.001   | 4.41 (1.89 to 10.31)         | .001    | -0.95 (-8.76 to 6.87)                  | .81     |

|             |                     |       |                      |       |                        |     |
|-------------|---------------------|-------|----------------------|-------|------------------------|-----|
| White       | 2.92 (1.59 to 5.36) | .001  | 5.51 (2.25 to 13.53) | <.001 | -0.80 (-9.01 to 7.40)  | .85 |
| Multiethnic | 4.09 (2.15 to 7.78) | <.001 | 4.48 (1.63 to 12.29) | .004  | -0.50 (-9.88 to 8.88)  | .92 |
| Other       | 3.62 (1.90 to 6.91) | <.001 | 5.16 (1.94 to 13.73) | .001  | -0.96 (-10.08 to 8.16) | .84 |

Note. <sup>a</sup>Estimates from univariable generalized linear mixed models with school random effects. <sup>b</sup>Binary logistic regression models in overall sample with data available for race/ethnicity (N = 3126). <sup>c</sup>Linear regression amongst past 30-day users (N = 464).

**eFigure. Recruitment Flowchart**

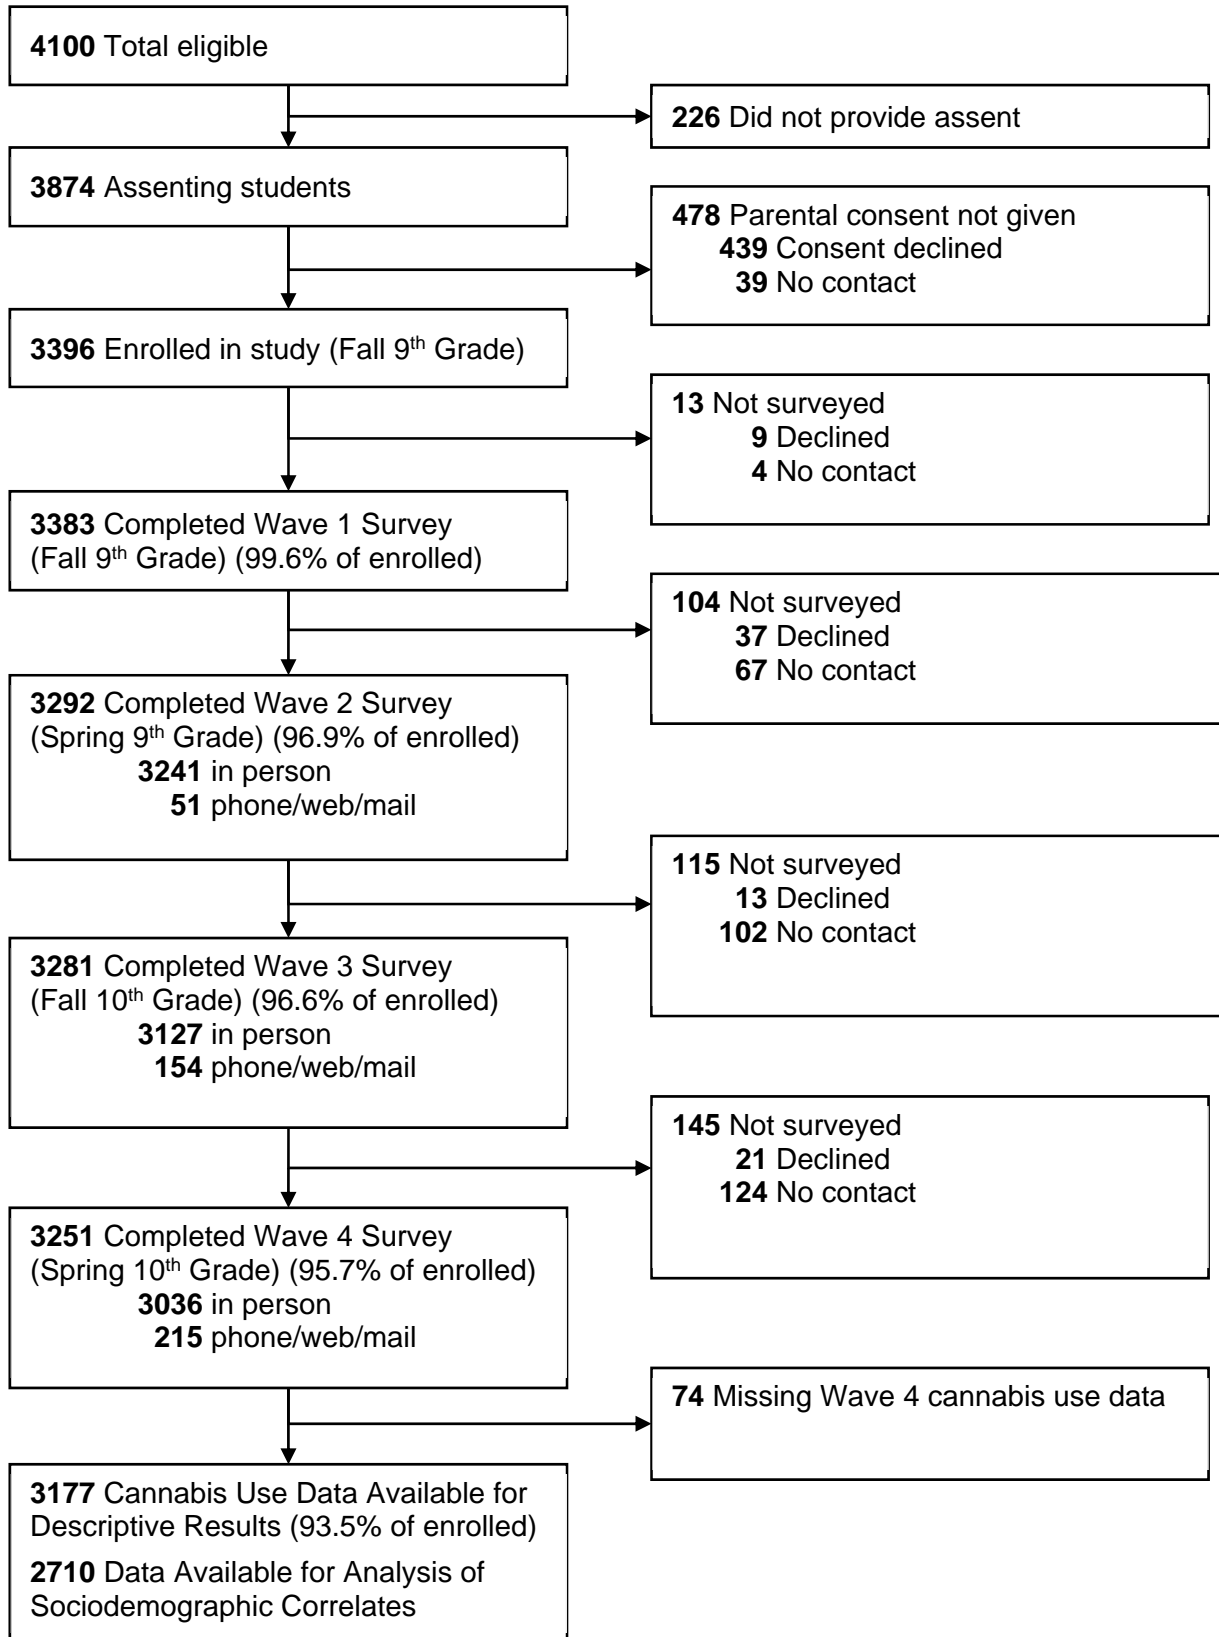

Supplement: jamanetwopen-1-e182765-s001.pdf [file jamanetwopen-1-e182765-s001.pdf]
